# Supplementary material for: Effect of supramolecular complexation of alkali hydrogenselenates with crown ethers and solid-solutions with their hydrogensulfate counterparts on the solid-to-solid phase transition behaviors
Source: Royal Society of Chemistry journal article supplement (doi:10.1039/d4ce00514g), 2024-01-01
Supplement: d4ce00514g1.pdf [file d4ce00514g1.pdf]

## Effect of Supramolecular Complexation of Alkali Hydrogenselenates with Crown Ethers and solid-solutions with their Hydrogensulfate Counterparts on the Solid-Solid Phase Transition Behaviors

*Samet Ocak,<sup>a,b</sup> Dario Braga,<sup>a</sup> Simone d'Agostino<sup>a,\*</sup>*

<sup>a</sup> The University of Bologna - Department of Chemistry "Giacomo Ciamician", Via F. Selmi 2, 40126, Bologna (BO), 40126, Italy.

<sup>b</sup> Current address: Institute for Microelectronics and Microsystems - Research National Council (IMM-CNR), Via Pietro Gobetti 101, 40129, Bologna (BO), Italy.

| Table of contents                                                                                                                                            | Page   |
|--------------------------------------------------------------------------------------------------------------------------------------------------------------|--------|
| Crystal data and refinement details for: <b>1</b> ·2H <sub>2</sub> O, <b>2</b> ·H <sub>2</sub> O, and <b>3</b> ·H <sub>2</sub> O                             | ESI-2  |
| Comparisons of calculated and experimental powder patterns: a) <b>1</b> ·2H <sub>2</sub> O, b) <b>2</b> ·H <sub>2</sub> O, and c) <b>3</b> ·H <sub>2</sub> O | ESI-3  |
| DSC trace of [18-crown-6·K]HSeO <sub>4</sub> ·2H <sub>2</sub> O                                                                                              | ESI-3  |
| VT-PXRD of [18-crown-6·K]HSeO <sub>4</sub>                                                                                                                   | ESI-3  |
| Comparison of the powder patterns of [18-crown-6·K]HSeO <sub>4</sub> and 18-crown-6·KHSO <sub>4</sub>                                                        | ESI-4  |
| DSC trace of [18-crown-6·Rb]HSeO <sub>4</sub> ·H <sub>2</sub> O                                                                                              | ESI-5  |
| Comparison of the powder patterns of [18-crown-6·Rb]HSeO <sub>4</sub> and [18-crown-6·Rb]HSO <sub>4</sub>                                                    | ESI-6  |
| DSC trace of [18-crown-6·Cs]HSeO <sub>4</sub> ·H <sub>2</sub> O                                                                                              | ESI-6  |
| Comparison of the powder patterns of [18-crown-6·CsHSO <sub>4</sub> ], 18-crown-6·CsHSeO <sub>4</sub> , and [18-crown-6·Rb]HSeO <sub>4</sub>                 | ESI-7  |
| PXRD of [18-crown-6·K](HSeO <sub>4</sub> ) <sub>x</sub> (HSO <sub>4</sub> ) <sub>1-x</sub>                                                                   | ESI-7  |
| PXRD of [18-crown-6·K](HSeO <sub>4</sub> ) <sub>x</sub> (HSO <sub>4</sub> ) <sub>1-x</sub>                                                                   | ESI-7  |
| DSC traces of solid-solutions [18-crown-6·K](HSeO <sub>4</sub> ) <sub>x</sub> (HSO <sub>4</sub> ) <sub>1-x</sub>                                             | ESI-8  |
| VT-PXRD of [18-crown-6·K](HSO <sub>4</sub> ) <sub>0.5</sub> (HSeO <sub>4</sub> ) <sub>0.5</sub>                                                              | ESI-8  |
| PXRD of [18-crown-6·Cs](HSeO <sub>4</sub> ) <sub>x</sub> (HSO <sub>4</sub> ) <sub>1-x</sub>                                                                  | ESI-9  |
| DSC traces of [18-crown-6·Cs](HSeO <sub>4</sub> ) <sub>x</sub> (HSO <sub>4</sub> ) <sub>1-x</sub>                                                            | ESI-9  |
| VT-PXRD of [18-crown-6·Cs](HSO <sub>4</sub> ) <sub>0.5</sub> (HSeO <sub>4</sub> ) <sub>0.5</sub>                                                             | ESI-10 |
| VT-PXRD of 18-crown-6·Cs(HSO <sub>4</sub> ) <sub>0.75</sub> (HSeO <sub>4</sub> ) <sub>0.25</sub>                                                             | ESI-10 |
| DSC trace of the trial of [18-crown-6·Rb](HSeO <sub>4</sub> ) <sub>0.5</sub> (HSO <sub>4</sub> ) <sub>0.5</sub>                                              | ESI-11 |
| Metal coordination and hydrogen bonds in [18-crown-6·K](HSeO <sub>4</sub> ) <sub>x</sub> (HSO <sub>4</sub> ) <sub>1-x</sub> (with x = 1, 0.5, 0)             | ESI-11 |

**Table ESI-1.** Crystal data and refinement details for: [18-crown-6·K]HSeO<sub>4</sub>·2H<sub>2</sub>O, [18-crown-6·Rb]HSeO<sub>4</sub>·H<sub>2</sub>O, [18-crown-6·Cs]HSeO<sub>4</sub>·H<sub>2</sub>O, [18-crown-6·K]HSeO<sub>4</sub>, and the solid solution [18-crown-6·K](HSeO<sub>4</sub>)<sub>0.5</sub>(HSO<sub>4</sub>)<sub>0.5</sub>.

|                                          | [18-crown-6·K]<br>HSeO <sub>4</sub> ·2H <sub>2</sub> O                  | [18-crown-6·Rb]<br>HSeO <sub>4</sub> ·H <sub>2</sub> O                | [18-crown-6·Cs]<br>HSeO <sub>4</sub> ·H <sub>2</sub> O                | [18-crown-6·K]<br>HSeO <sub>4</sub>                 | [18-crown-6·K]<br>(HSeO <sub>4</sub> ) <sub>0.5</sub> (HSO <sub>4</sub> ) <sub>0.5</sub> |
|------------------------------------------|-------------------------------------------------------------------------|-----------------------------------------------------------------------|-----------------------------------------------------------------------|-----------------------------------------------------|------------------------------------------------------------------------------------------|
| <b>Formula</b>                           | C <sub>12</sub> H <sub>25</sub> KO <sub>10</sub> Se·2(H <sub>2</sub> O) | C <sub>12</sub> H <sub>25</sub> O <sub>10</sub> RbSe·H <sub>2</sub> O | C <sub>12</sub> H <sub>24</sub> CsO <sub>11</sub> Se·H <sub>2</sub> O | C <sub>12</sub> H <sub>24</sub> KO <sub>11</sub> Se | C <sub>12</sub> H <sub>5</sub> KO <sub>11</sub> Se <sub>0.5</sub> S <sub>0.5</sub>       |
| <b>FW (g/mol)</b>                        | 483.41                                                                  | 511.76                                                                | 556.18                                                                | 447.38                                              | 423.93                                                                                   |
| <b>Cryst. Sys.</b>                       | Monoclinic                                                              | Monoclinic                                                            | Monoclinic                                                            | Monoclinic                                          | Monoclinic                                                                               |
| <b>Space Group</b>                       | Cc                                                                      | C2/c                                                                  | I2/a                                                                  | P2 <sub>1</sub> /n                                  | P2 <sub>1</sub> /n                                                                       |
| <b>a/Å</b>                               | 14.4882(5)                                                              | 22.1681(14)                                                           | 23.7101(16)                                                           | 10.3653(5)                                          | 10.3093(8)                                                                               |
| <b>b/Å</b>                               | 17.5369(5)                                                              | 9.9047(4)                                                             | 8.4597(7)                                                             | 8.5649(6)                                           | 8.5230(6)                                                                                |
| <b>c/Å</b>                               | 8.4421(3)                                                               | 20.5896(12)                                                           | 21.3553(18)                                                           | 21.5820(14)                                         | 21.5977(15)                                                                              |
| <b>α/°</b>                               | 90                                                                      | 90                                                                    | 90                                                                    | 90                                                  | 90                                                                                       |
| <b>β/°</b>                               | 100.351                                                                 | 117.183                                                               | 109.486                                                               | 100.137(5)                                          | 99.684(7)                                                                                |
| <b>γ/°</b>                               | 90                                                                      | 90                                                                    | 90                                                                    | 90                                                  | 90                                                                                       |
| <b>Volume/Å<sup>3</sup></b>              | 2110.04(12)                                                             | 4021.5(5)                                                             | 4038.1(6)                                                             | 1886.1(2)                                           | 1870.7(2)                                                                                |
| <b>Z</b>                                 | 4                                                                       | 8                                                                     | 8                                                                     | 4                                                   | 4                                                                                        |
| <b>ρ<sub>calc</sub> g/cm<sup>3</sup></b> | 1.522                                                                   | 1.691                                                                 | 1.83                                                                  | 1.576                                               | 1.505                                                                                    |
| <b>μ/mm<sup>-1</sup></b>                 | 2.03                                                                    | 4.32                                                                  | 3.69                                                                  | 2.256                                               | 1.358                                                                                    |
| <b>measd rflns</b>                       | 4271                                                                    | 8182                                                                  | 8935                                                                  | 8987                                                | 8510                                                                                     |
| <b>indep rflns</b>                       | 2952                                                                    | 4533                                                                  | 4576                                                                  | 4269                                                | 4312                                                                                     |
| <b>R<sub>1</sub></b>                     | 0.054                                                                   | 0.05                                                                  | 0.079                                                                 | 0.0998                                              | 0.0800                                                                                   |
| <b>wR<sub>2</sub></b>                    | 0.145                                                                   | 0.074                                                                 | 0.189                                                                 | 0.2103                                              | 0.1624                                                                                   |

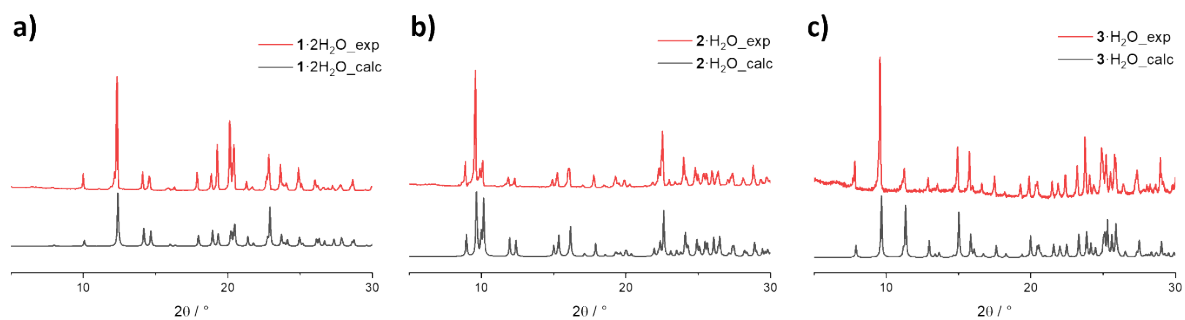

**Figure ESI-1.** Comparisons of calculated and experimental powder patterns: a)  $1 \cdot 2\text{H}_2\text{O}$ , b)  $2 \cdot \text{H}_2\text{O}$ , and c)  $3 \cdot \text{H}_2\text{O}$ .

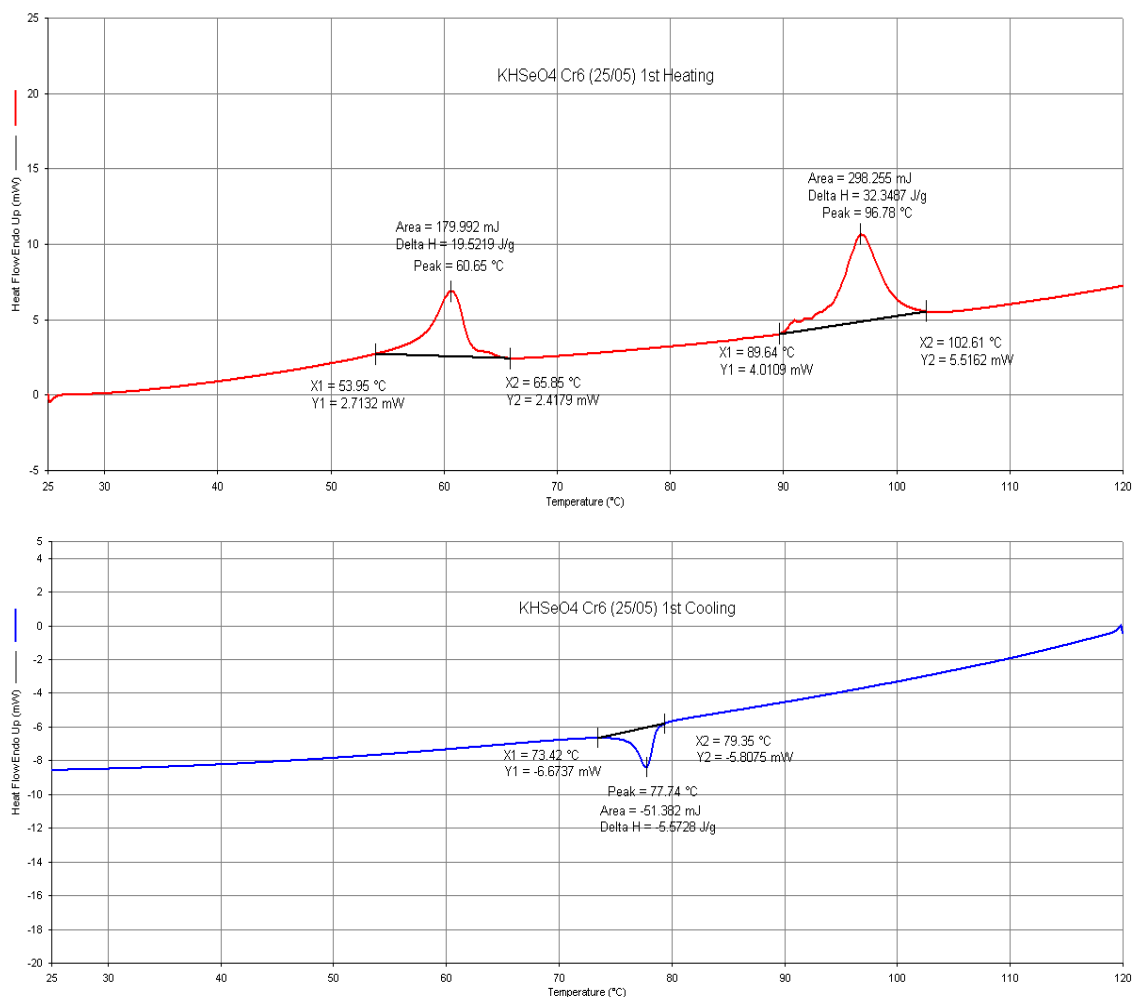

**Figure ESI-2.** DSC trace of  $[\text{18-crown-6} \cdot \text{K}]\text{HSeO}_4 \cdot 2\text{H}_2\text{O}$

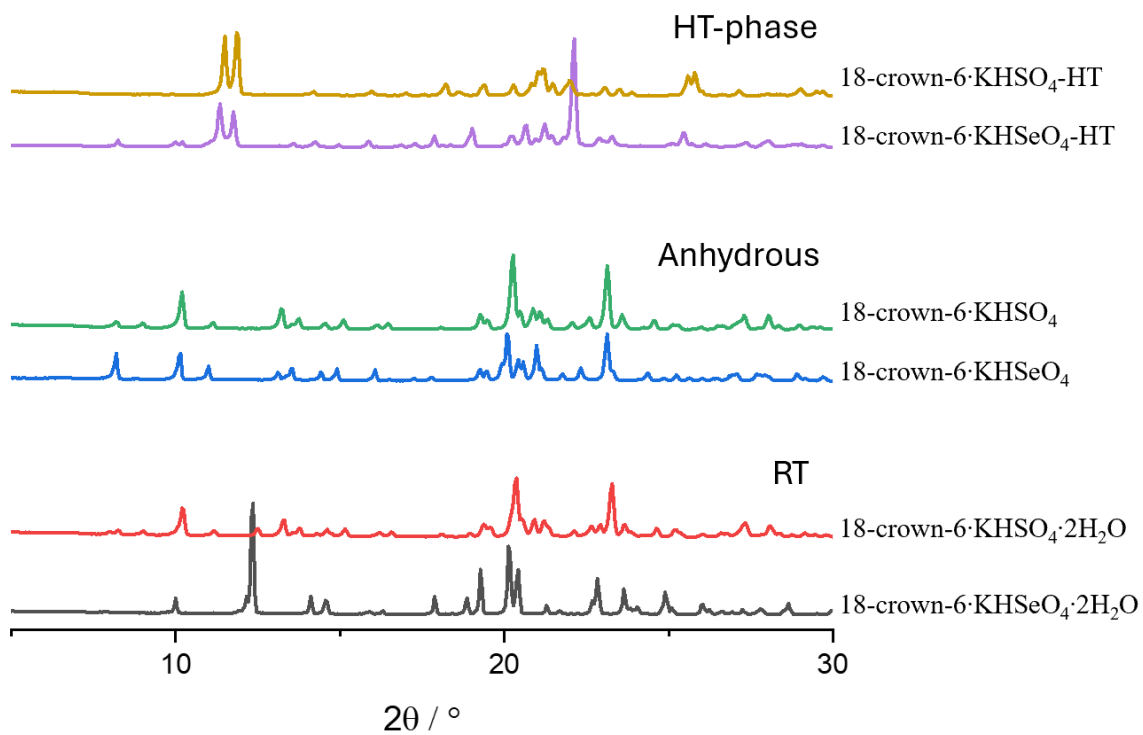

**Figure ESI-3.** Comparison of the powder patterns of [18-crown-6·K]HSeO<sub>4</sub> and 18-crown-6·KHSO<sub>4</sub> in increasing temperatures.

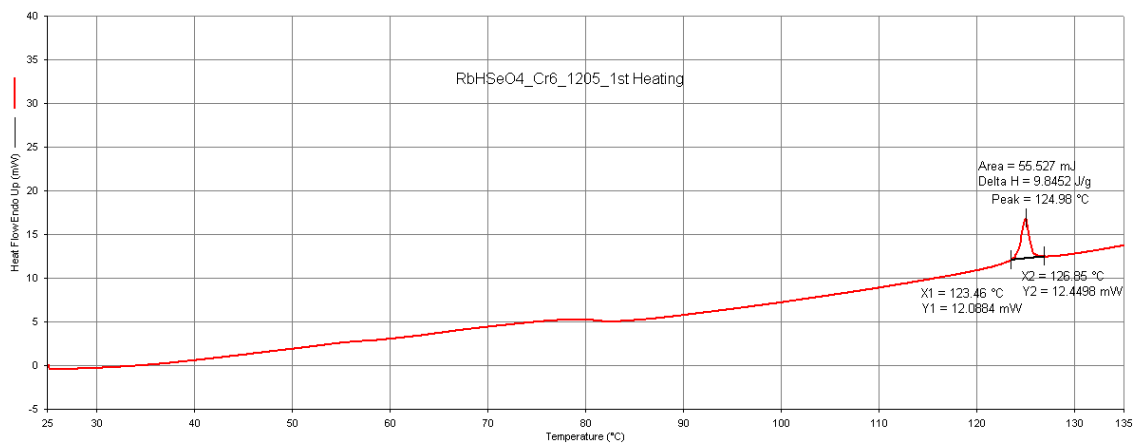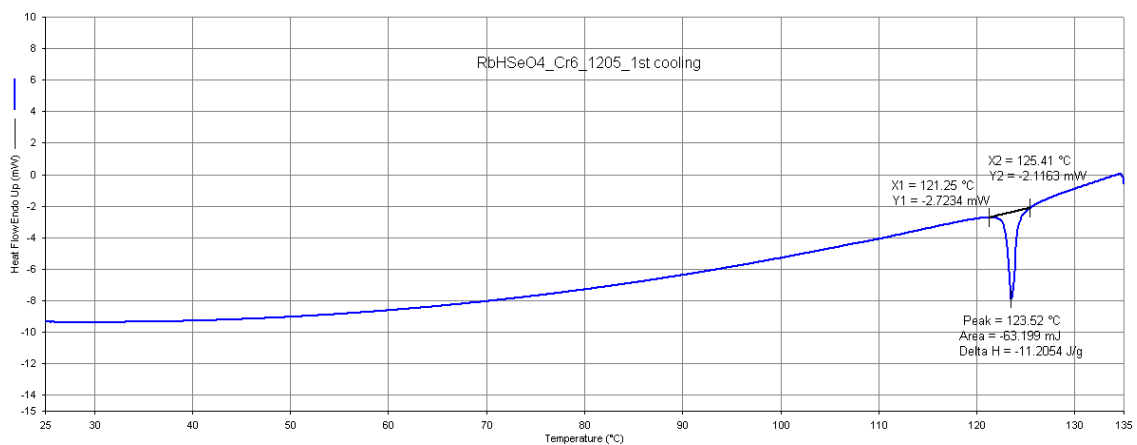

**Figure ESI-4.** DSC trace of [18-crown-6·Rb]HSeO<sub>4</sub>·H<sub>2</sub>O

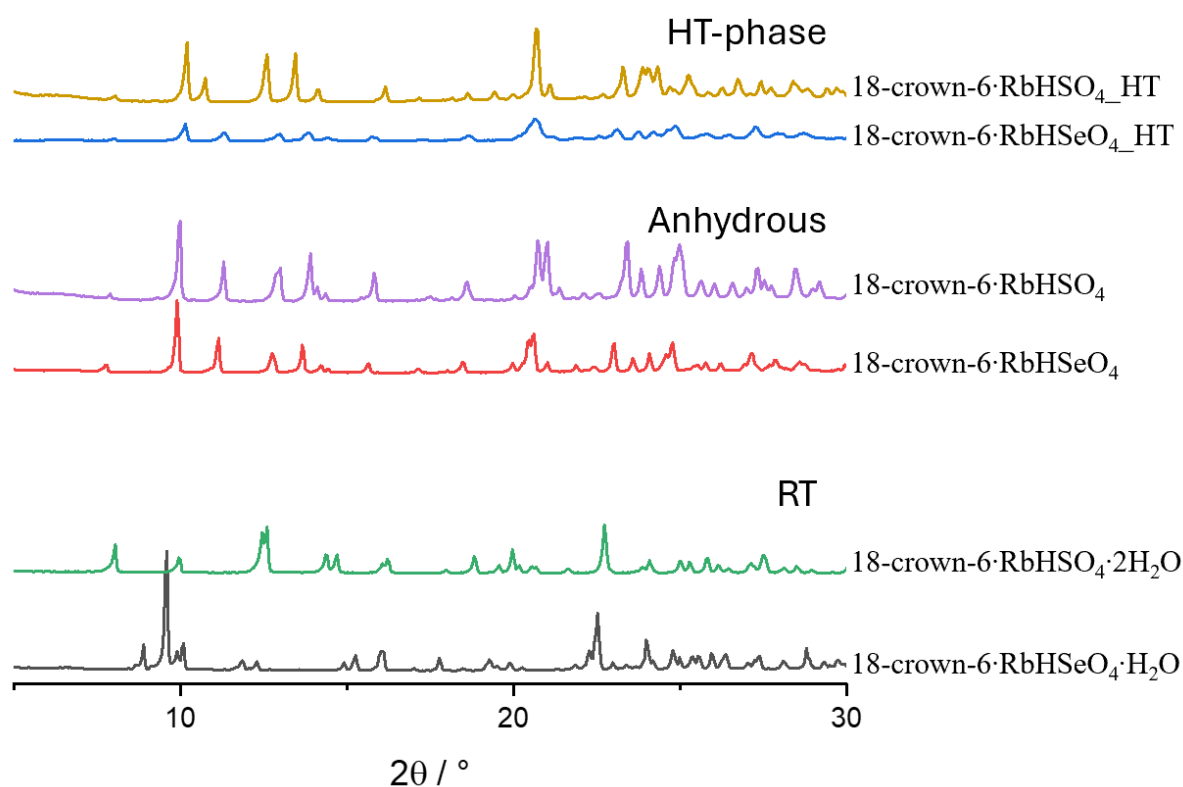

**Figure ESI-5.** Comparison of the powder patterns of [18-crown-6·Rb]HSeO<sub>4</sub> and 18-crown-6·RbHSO<sub>4</sub> in increasing temperatures.

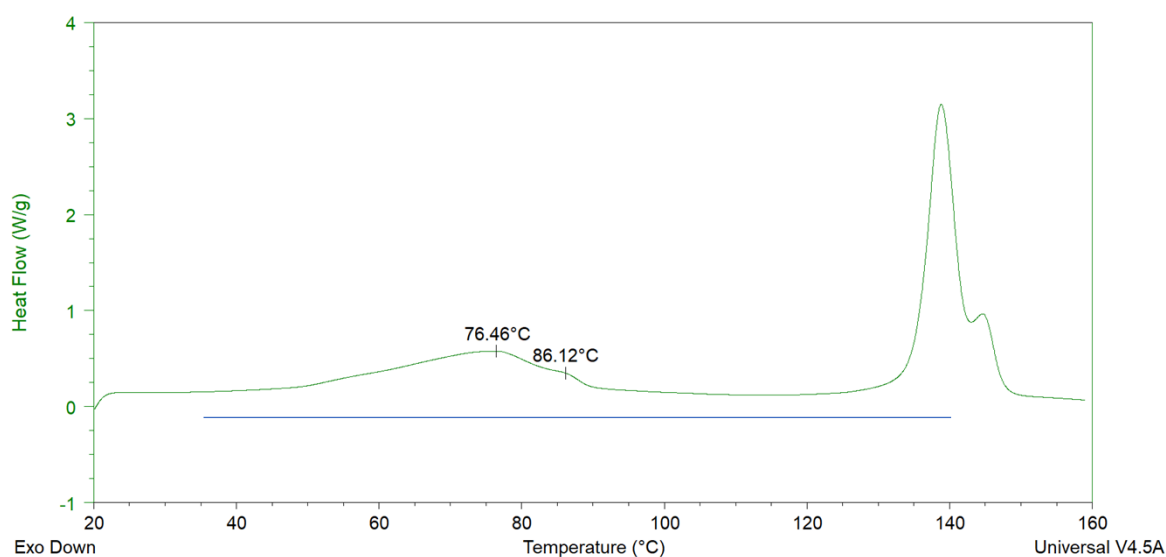

**Figure ESI-6.** DSC trace of [18-crown-6·Cs]HSeO<sub>4</sub>·H<sub>2</sub>O

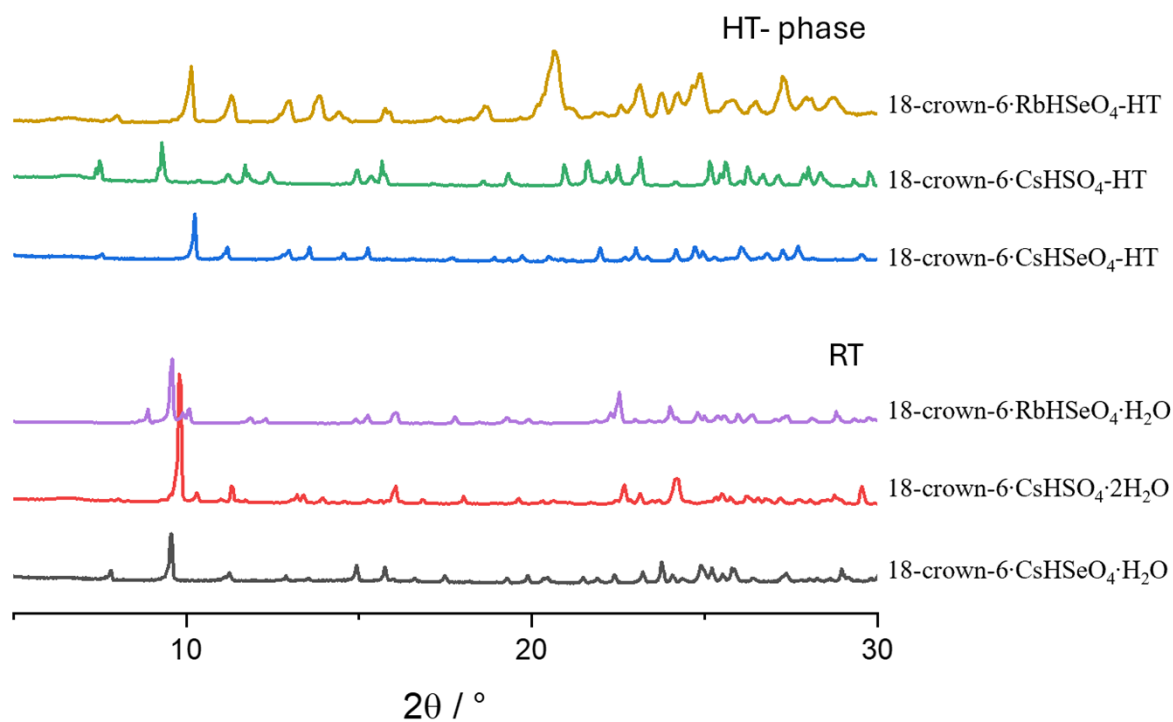

**Figure ESI-7.** Comparison of the powder patterns of [18-crown-6·CsHSO<sub>4</sub>], 18-crown-6·CsHSeO<sub>4</sub>, and 18-crown-6·RbHSeO<sub>4</sub> in increasing temperatures.

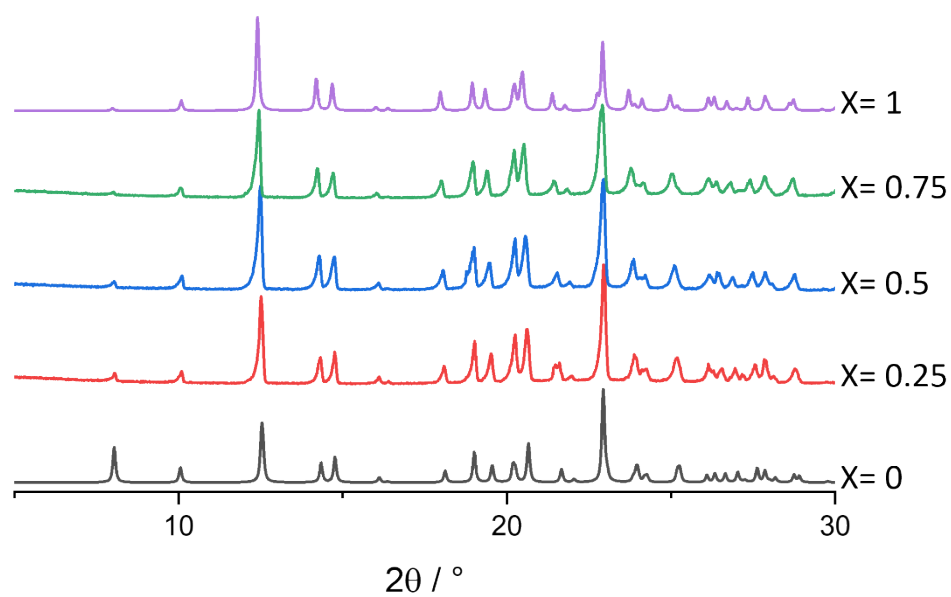

**Figure ESI-8.** PXRD of [18-crown-6·K](HSeO<sub>4</sub>)<sub>x</sub>(HSO<sub>4</sub>)<sub>1-x</sub>.

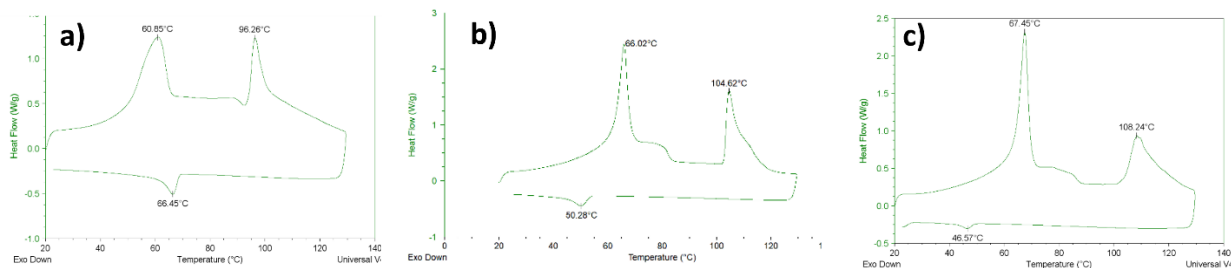

**Figure ESI-9.** DSC traces of [18-crown-6·K](HSeO<sub>4</sub>)<sub>x</sub>(HSO<sub>4</sub>)<sub>1-x</sub>. a)  $x = 0.75$ , b)  $x = 0.5$ , c)  $x = 0.25$ .

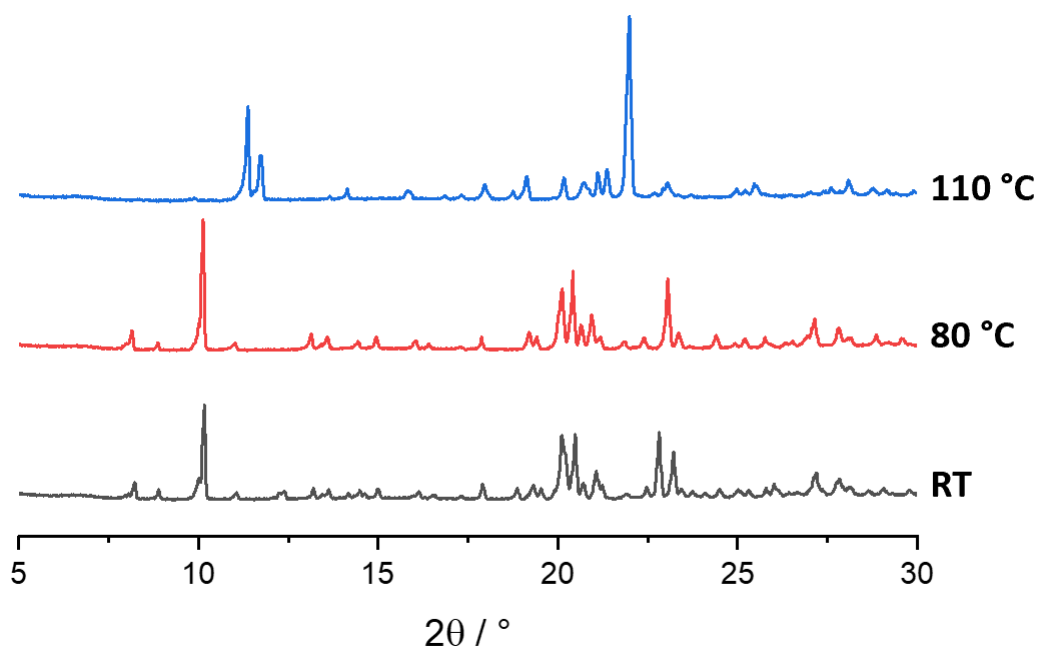

**Figure ESI-10.** VT-PXRD of 18-crown-6·K(HSO<sub>4</sub>)<sub>0.5</sub>(HSeO<sub>4</sub>)<sub>0.5</sub>.



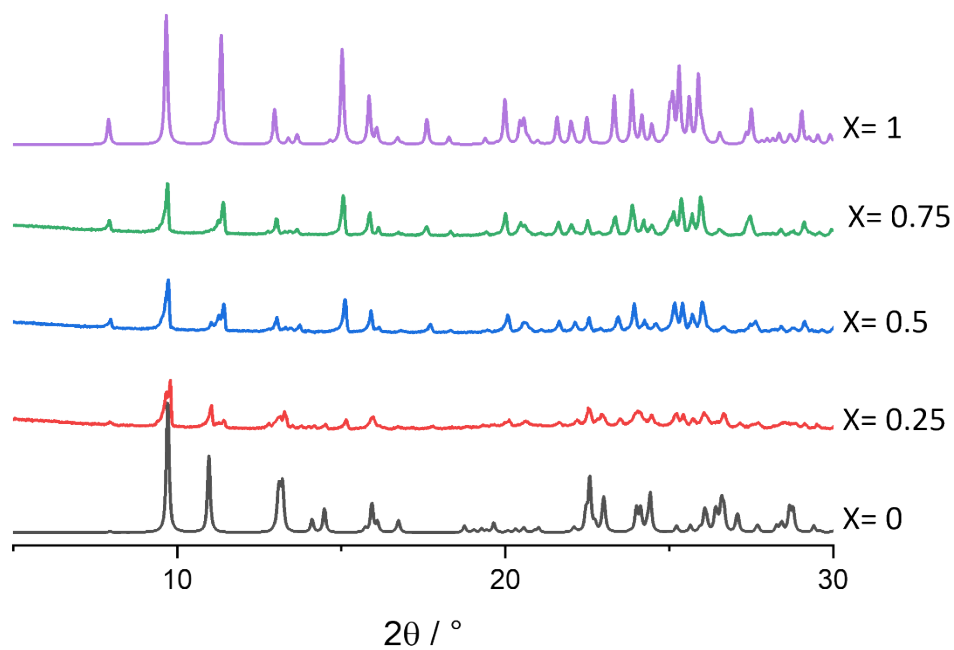

**Figure ESI-11.** PXRD of  $[18\text{-crown-6}\cdot\text{Cs}](\text{HSeO}_4)_x(\text{HSO}_4)_{1-x}$ .

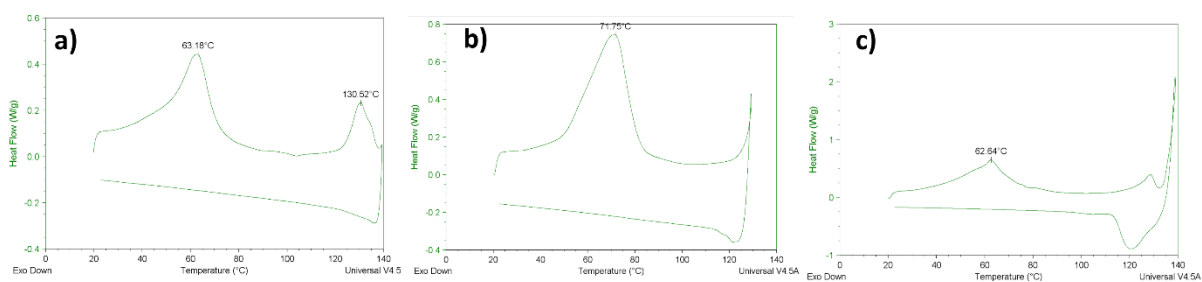

**Figure ESI-12.** DSC traces of  $[18\text{-crown-6}\cdot\text{Cs}](\text{HSeO}_4)_x(\text{HSO}_4)_{1-x}$ . a)  $x = 0.75$ , b)  $x = 0.5$ , c)  $x = 0.25$ .

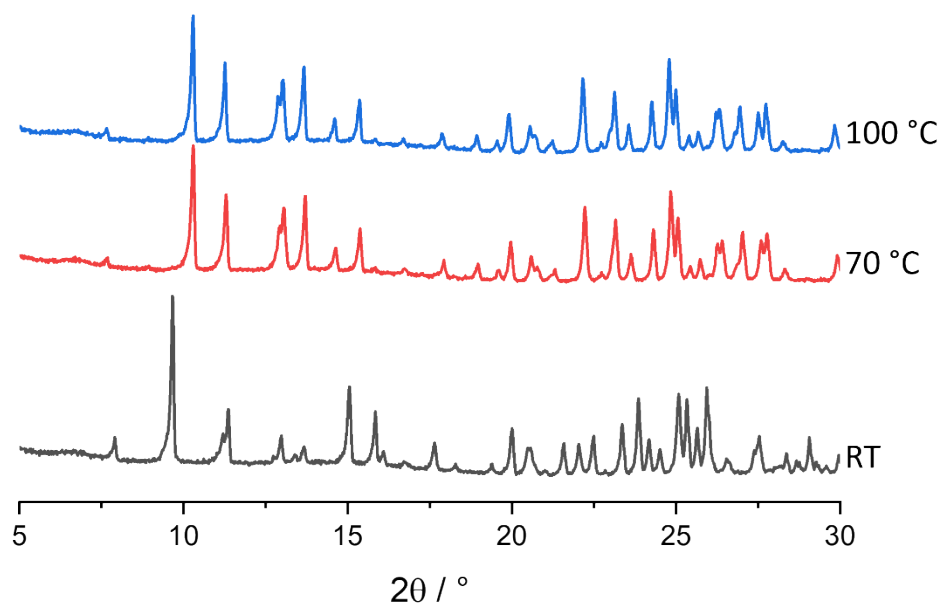

**Figure ESI-13.** VT-PXRD of 18-crown-6·Cs(HSO<sub>4</sub>)<sub>0.5</sub>(HSeO<sub>4</sub>)<sub>0.5</sub>.

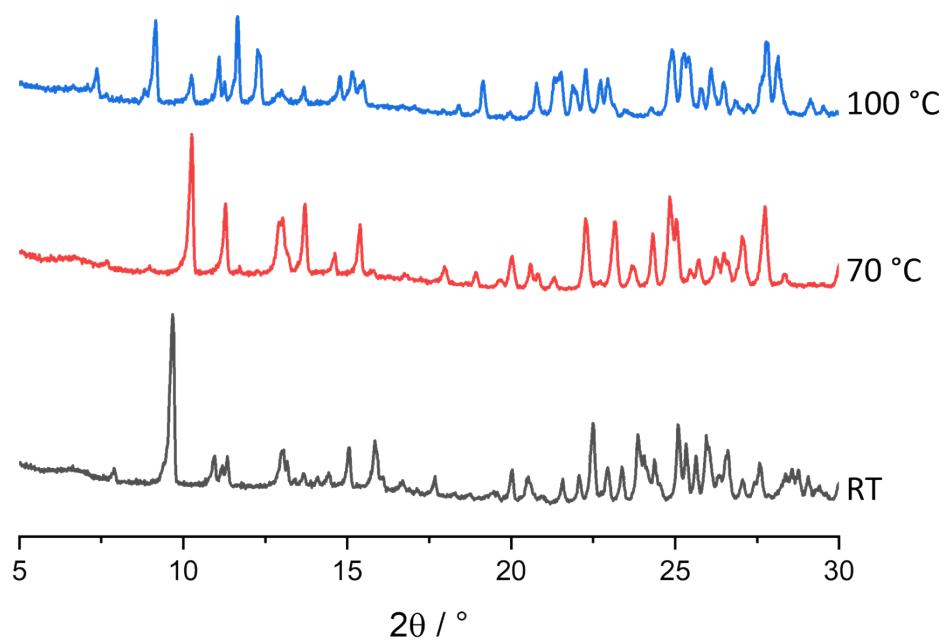

**Figure ESI-14.** VT-PXRD of 18-crown-6·Cs(HSO<sub>4</sub>)<sub>0.75</sub>(HSeO<sub>4</sub>)<sub>0.25</sub>.

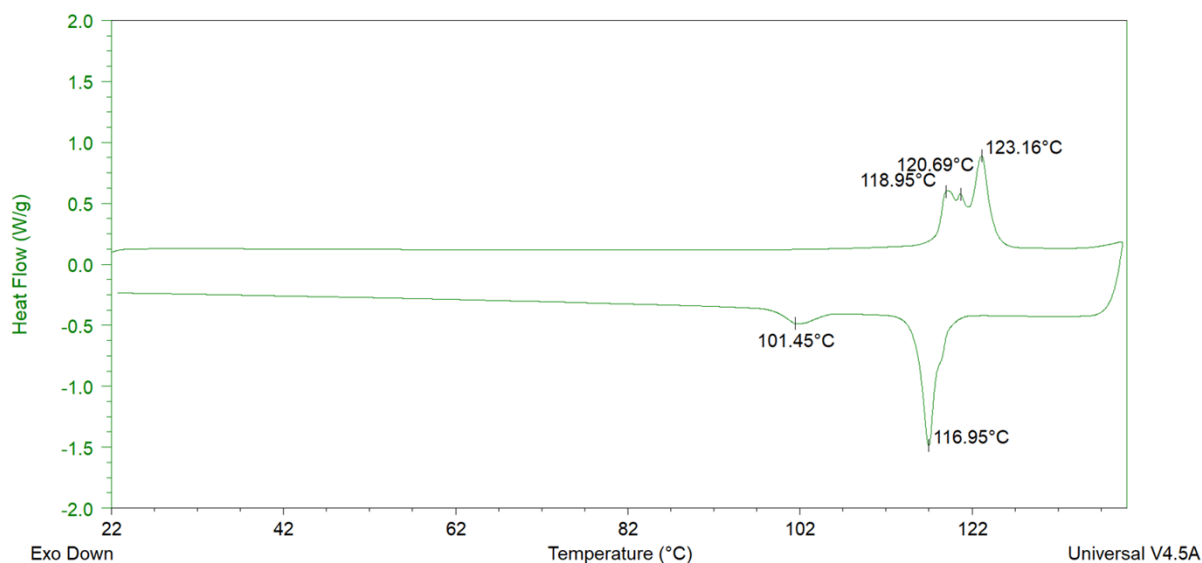

**Figure ESI-15.** DSC trace of the trial of [18-crown-6·Rb](HSeO<sub>4</sub>)<sub>0.5</sub>(HSO<sub>4</sub>)<sub>0.5</sub>

**Table ESI-2.** Metal coordination distances and hydrogen bonding interactions detected within crystalline [18-crown-6·K]HSO<sub>4</sub>, [18-crown-6·K]HSeO<sub>4</sub>, and their solid solution [18-crown-6·K](HSeO<sub>4</sub>)<sub>0.5</sub>(HSO<sub>4</sub>)<sub>0.5</sub>.

|                                                                   | [18-crown-6·K]HSO <sub>4</sub> | [18-crown-6·K](HSeO <sub>4</sub> ) <sub>0.5</sub> (HSO <sub>4</sub> ) <sub>0.5</sub> | [18-crown-6·K]HSeO <sub>4</sub> |
|-------------------------------------------------------------------|--------------------------------|--------------------------------------------------------------------------------------|---------------------------------|
| <b>K<sup>+</sup> ... O<sub>anion</sub></b>                        | 2.803(7) - 2.850(7)            | 2.7403 - 2.9966                                                                      | 2.842(7) - 2.881(7)             |
| <b>H-bond</b><br><b>(O<sub>anion</sub> ... O<sub>anion</sub>)</b> | 2.561(8)                       | 2.4750 - 2.8815                                                                      | 2.555(8)                        |
